# Supplementary material for: Six Serum miRNAs Fail to Validate as Myotonic Dystrophy Type 1 Biomarkers
Source: PLoS One. 2016 Feb 26;11(2):e0150501. doi: 10.1371/journal.pone.0150501 (PMC4769077; doi:10.1371/journal.pone.0150501)
Supplement: S1 Table — (XLS) [file pone.0150501.s002.xls]

## Sheet: RAW DATA
Table S1. Ct values for 175 miRNAs in DM1 and healthy controls serum
	P_1	P_2	P_3	P_4	P_5	P_6	P_7	P_8	P_9	P_10	C_11	C_12	C_13	C_14	C_15	C_16	C_17	C_18	C_19	C_20
hsa-let-7a	29.1886	29.3333	28.8273	28.6797	29.3544	27.8198	27.4421	27.5378	27.6842	28.363	30.1149	30.4925	30.9226	28.2816	28.6082	30.6489	28.7502	29.3215	29.0542	27.0536
hsa-let-7b	25.5066	26.2106	24.8026	25.2422	25.9967	24.9444	25.4827	24.6404	24.8182	24.6164	25.3478	26.9221	26.1393	25.9637	25.4253	26.5687	25.9813	25.4928	25.8524	24.5932
hsa-let-7b*	32.0634	31.636	31.995	31.8405	24.892	31.7492	33.76	32.3365	33.092	32.3477	31.6689	32.5408	32.5609	32.065	33.7872	35.6397	32.9357	33.3063	34.3966	31.9866
hsa-let-7c	31.0439	31.1578	30.8512	30.7784	31.707	30.1196	30.0255	29.6313	30.4345	29.9927	31.1918	32.6766	32.6083	29.9464	30.7008	32.2066	30.6689	31.403	32.3345	29.607
hsa-let-7d	29.4451	30.4866	29.9343	31.1566	30.6491	28.4112	28.3617	28.5203	28.6535	28.5711	31.4877	31.4102	31.4264	29.3624	29.8689	31.88	30.6393	31.4429	31.2613	28.8211
hsa-let-7d*	28.1072	27.1977	27.5907	27.158	27.9932	27.5448	27.8443	27.2625	26.9002	27.6099	27.2336	27.7043	27.7222	27.0993	28.1941	29.7779	28.5151	29.3748	29.006	27.412
hsa-let-7e	30.347	30.4487	30.8551	30.7975	31.1235	30.3781	29.7453	30.7366	30.6084	30.4768	32.2521	32.192	31.753	30.1675	30.8242	31.6735	30.913	32.249	32.3482	30.1917
hsa-let-7f	27.8986	28.7141	28.3987	28.6773	29.6061	27.408	27.4939	27.0394	27.4455	27.336	30.1811	29.6838	30.1128	28.4899	27.5679	30.145	28.3482	28.5392	28.6974	26.439
hsa-let-7g	26.2594	27.0578	26.5331	26.1509	27.4192	26.0198	26.5595	25.8832	26.0483	25.3437	27.075	28.6635	29.2102	26.5249	26.7577	28.728	26.8873	27.1034	27.815	25.8465
hsa-let-7i	27.4112	28.4683	27.0292	27.3167	28.5402	27.4251	27.85	26.9188	27.4002	27.1442	28.264	29.3267	29.5287	27.9365	27.625	29.496	28.4791	28.5152	29.3093	26.9215
hsa-let-7i*	31.8556	31.5178	31.3741	31.0806	32.6459	32.1829	33.3851	31.8705	31.5951	32.2136	31.9352	32.5875	33.6622	30.6761	32.6284	35.1552	32.3842	32.8421	34.0667	31.3777
hsa-miR-1	26.1738	27.1388	27.401	27.3073	32.6489	31.4516	32.5205	29.9804	30.8007	31.1839	27.2783	28.9455	29.1295	26.5296	34.1571	35.5842	31.711	34.5211	32.8861	30.0859
hsa-miR-101	24.963	25.6901	24.7486	25.0178	27.7401	26.8184	27.8984	25.8952	26.4148	25.8883	25.7303	27.0572	27.3657	25.4727	26.6426	28.8297	26.9426	26.7421	26.4773	27.4735
hsa-miR-103	25.3928	26.2633	25.5156	25.8627	26.5447	24.8576	24.9778	24.5861	24.717	24.479	26.7236	27.3878	28.1989	25.126	26.4036	29.1728	26.5628	27.4187	26.8106	24.9782
hsa-miR-103-2*	31.0751	31.1245	30.7355	30.6726	32.7399	31.514	32.0919	30.561	30.7879	31.0616	31.7354	32.6393	33.3782	31.823	31.887	33.5376	31.8773	27.183	32.2604	30.3762
hsa-miR-106a	25.1807	26.1942	24.9913	25.238	26.0891	24.9678	25.4233	24.555	24.484	24.4303	26.1544	27.3503	27.867	25.0524	26.0693	28.1404	26.3179	26.6522	26.4806	24.8954
hsa-miR-106b	28.5937	29.2906	27.6502	27.592	30.1499	29.5156	29.697	28.9673	28.649	29.2074	29.3681	30.2049	30.8426	28.4847	29.1403	31.317	29.1032	29.2931	29.4929	27.9996
hsa-miR-106b*	31.0752	31.5196	30.8386	32.3991	31.9011	32.351	32.0886	30.3588	30.9908	30.9338	32.3782	32.501	33.7436	31.6461	32.9644	NAN	33.6267	33.7156	32.7504	31.6566
hsa-miR-107	26.4912	27.333	26.3914	26.9976	27.0738	25.6711	25.8282	25.3726	25.4338	25.6567	27.541	28.5038	28.9395	26.136	27.3135	29.831	27.4176	27.9973	27.593	26.1729
hsa-miR-10a	33.1407	33.2467	35.5131	34.1665	35.1263	34.8295	34.4295	34.2681	34.5186	36.018	34.0943	NAN	34.7411	32.9153	33.596	34.8148	32.5073	33.9391	33.4953	33.1945
hsa-miR-10b	31.7821	31.7768	32.7014	35.0262	34.231	33.5915	33.0594	32.2386	32.3387	32.1888	33.0494	34.9209	35.1995	32.3807	34.6165	32.9858	32.3854	32.8436	32.0371	32.6539
hsa-miR-122	25.2987	24.1417	25.9016	24.9033	26.6567	26.8655	26.4086	25.923	27.6097	23.568	25.2752	26.015	27.4876	26.4731	25.4071	26.8021	26.4182	25.9225	25.5297	24.6352
hsa-miR-125a-5p	28.9212	28.9755	29.644	29.5899	30.9015	28.8397	29.3298	29.1335	29.6267	29.3576	29.8871	30.3006	29.9921	28.9703	29.6822	30.672	30.0699	30.9069	29.9338	29.0961
hsa-miR-125b	29.1105	29.5011	29.3028	29.639	31.197	30.4967	30.6698	28.9114	29.707	28.9735	30.9922	30.6986	31.1619	29.8026	30.8972	32.5452	30.3395	31.001	30.3836	29.3771
hsa-miR-126	23.8493	24.6141	24.1503	24.5907	26.1642	24.8354	24.9255	24.1437	24.2874	24.4528	25.5105	26.2376	26.269	24.3872	24.9318	26.2686	24.7417	26.0708	25.5282	23.8718
hsa-miR-127-3p	29.787	31.4365	30.5509	31.2807	33.8734	31.572	32.1767	30.6108	31.3992	30.9732	31.346	32.0443	32.5028	31.39	31.491	34.2335	33.0692	32.6791	33.0134	30.7061
hsa-miR-128	30.2407	30.6917	29.9817	30.0789	30.9815	29.879	30.0902	29.8982	29.3801	30.0874	30.9038	30.465	32.2958	30.0444	31.1992	32.6445	31.3928	32.4535	32.6278	29.7393
hsa-miR-130a	28.3031	29.5704	28.3481	29.9941	29.259	27.4954	28.136	27.6374	27.5552	28.1226	30.159	31.2416	31.9815	27.8713	31.1604	32.4076	29.8673	31.2705	30.801	28.4285
hsa-miR-132	30.258	30.4079	29.6032	29.5953	26.3279	26.3069	27.0195	26.5474	26.2674	26.415	29.8839	30.4936	30.7986	28.9564	27.8931	28.813	26.8664	27.3281	32.0579	27.1299
hsa-miR-133a	25.5241	26.7718	27.16	26.8732	31.7639	30.7267	31.4425	29.3827	29.9892	30.605	26.4415	27.6814	28.5795	26.0581	33.5468	34.7219	31.7181	34.6324	31.3425	30.5908
hsa-miR-133b	26.0264	27.0795	27.4321	26.961	30.8029	29.9382	30.81	29.9873	30.1227	31.3416	26.9053	27.8943	28.576	26.2521	31.7603	32.2906	30.9083	32.3683	32.0193	30.553
hsa-miR-136	27.3781	29.7347	28.3109	28.5771	NAN	33.1964	34.5515	33.8499	32.809	33.6885	28.9139	29.4653	30.4636	28.9637	28.8102	32.7424	30.7654	32.3158	28.9731	28.987
hsa-miR-139-5p	30.8098	31.07	30.4931	30.2988	32.0727	30.804	30.5332	30.6577	30.7648	30.4929	31.3907	31.509	31.2683	30.0667	30.8392	32.3971	31.3855	31.9147	30.8409	30.0789
hsa-miR-140-3p	26.6958	27.4667	25.8792	26.2607	27.9055	27.1019	27.603	26.7198	26.6638	26.6223	26.5576	27.9207	27.8795	27.0319	27.598	29.5616	28.2694	27.9971	27.9467	27.0437
hsa-miR-140-5p	29.0375	30.1088	29.1762	28.5537	31.7541	28.879	30.0892	29.07	29.3483	28.8061	28.9549	30.0931	29.6895	28.4726	29.595	31.6465	30.4003	31.3843	30.2785	29.0932
hsa-miR-142-3p	23.5551	24.5405	24.2302	24.1753	26.8838	25.6688	25.6474	25.3321	25.1246	25.4307	24.2509	25.6125	25.9686	23.6457	25.1103	27.9332	25.1276	26.3003	24.916	23.8769
hsa-miR-142-5p	26.7158	27.1343	27.3136	27.2591	28.3424	28.0053	28.0353	27.3727	27.3403	27.6288	27.5731	28.6076	30.4045	25.9651	29.2303	31.498	28.7424	30.8556	29.2627	27.7673
hsa-miR-143	27.2	27.5466	27.3032	28.4274	28.3078	29.1169	28.7281	27.7669	27.3178	27.5258	27.3619	28.132	28.7582	27	28.8876	30.7997	28.3019	28.8338	28.7404	27.8269
hsa-miR-144	23.2302	24.6664	22.8266	23.0334	27.4498	26.3434	27.4126	25.3494	25.4719	25.2204	23.9364	25.4926	26.7297	23.4427	27.0627	28.8368	25.4975	26.3259	25.5599	25.2014
hsa-miR-144*	29.3262	30.1424	30.3055	29.1743	31.5676	30.2506	31.2594	30.0822	30.1355	29.7608	29.8312	30.5127	31.5472	29.3477	30.6124	31.9731	29.8809	29.8656	30.7997	29.437
hsa-miR-145	28.5081	28.3659	28.6556	29.0345	29.5317	29.7339	29.5597	28.4115	27.6989	28.9142	28.4266	29.3169	29.9767	28.1337	30.0165	33.2751	29.2877	30.7061	29.3959	29.5289
hsa-miR-146a	27.829	27.611	27.8338	27.8103	29.4294	27.3813	27.4335	26.8901	26.9873	27.6349	28.7011	28.4035	28.449	27.5721	27.312	29.0202	28.405	30.1317	29.0518	27.0189
hsa-miR-148a	27.5668	27.0633	27.7963	27.4322	28.7041	28.6276	29.1227	27.9023	27.9466	27.0679	28.2687	28.5827	29.6685	27.2702	28.479	29.7065	28.6735	29.3608	28.9825	27.3338
hsa-miR-148b	26.8218	27.3563	26.7357	27.2176	29.4504	28.3408	28.5468	27.74	27.4796	27.728	28.1871	28.3128	29.4113	27.2971	27.8457	29.9779	28.5645	29.6586	28.993	26.978
hsa-miR-150	26.672	26.5662	26.9784	25.234	27.195	27.3157	27.6237	26.2697	27.7834	27.3415	24.5819	28.5369	27.2087	28.017	25.9903	27.3694	26.4478	26.6269	26.0738	26.5837
hsa-miR-151-3p	28.4611	28.5578	28.163	28.4242	33.0866	28.7328	28.7669	28.4888	28.3687	28.6487	29.8341	29.5597	28.8675	28.5582	28.6598	29.8602	29.3482	30.5261	29.3362	27.7554
hsa-miR-151-5p	27.1035	27.5915	27.2789	27.8106	29.2935	27.2977	27.1297	26.944	27.3516	27.0401	28.5627	28.9834	28.857	27.2062	27.4616	29.2622	28.4582	29.5987	28.3686	26.5584
hsa-miR-152	29.7011	29.3846	29.8492	29.5696	31.6174	31.5807	31.529	30.0556	30.1056	30.5358	30.5598	30.7293	30.8797	30.2377	30.1852	31.8295	31.0933	31.8692	31.548	29.5176
hsa-miR-154	30.4716	34.7998	31.854	31.2074	34.2536	32.7277	32.9632	31.262	31.4753	31.5169	32.9043	32.8906	NAN	31.6229	30.9415	35.3403	33.3897	33.973	33.2751	30.8776
hsa-miR-155	32.6863	31.5453	31.9006	33.3315	33.1845	30.5114	31.2337	31.3728	31.2582	31.4512	31.5688	34.6251	34.984	32.6066	31.3258	32.7728	31.5747	32.2311	31.8244	31.8278
hsa-miR-15a	23.5771	24.546	23.1533	23.5099	24.8069	23.8038	24.4636	23.4163	23.5827	23.537	24.1687	25.5663	25.8794	23.9099	24.4757	26.3863	24.8906	24.7033	24.8841	23.4265
hsa-miR-15b	25.9375	26.4419	26.0106	25.9837	26.8938	26.1613	26.8473	25.2833	25.5855	25.8907	26.7477	27.5032	27.3432	25.526	25.9407	28.0813	26.8184	26.7224	26.9651	24.9971
hsa-miR-15b*	30.7864	30.8989	29.728	29.7426	31.5478	30.6391	31.2864	30.0127	29.8149	30.6373	31.7215	33.0487	32.2857	30.4362	30.763	32.7343	31.6548	31.0379	32.09	30.0202
hsa-miR-16	21.9032	22.2695	20.4714	21.2486	22.3735	21.7418	22.7162	20.9786	20.8362	20.9162	22.4207	23.9543	24.7845	22.1149	21.8496	23.8881	22.7152	22.251	22.9646	21.3548
hsa-miR-16-2*	29.168	30.2955	28.7185	28.3938	30.8347	30.247	30.8811	29.4491	29.3163	29.5156	30.3434	31.2346	30.5643	29.294	29.6949	32.312	30.5795	30.4336	30.8708	29.2404
hsa-miR-17	29.1233	29.9361	28.8534	28.548	29.4475	28.5501	29.1124	28.2697	27.8493	28.1319	29.5585	31.2496	32.937	28.9241	29.7179	31.3338	29.5926	30.5769	29.8988	28.7362
hsa-miR-181a	27.6987	28.4756	27.3177	28.1641	29.0197	28.234	28.0766	27.7246	28.0287	26.847	28.0614	28.6765	28.8686	28.0629	27.7476	29.6676	28.2821	29.2932	28.7606	27.5361
hsa-miR-182	32.9587	34.5901	34.3032	31.8428	34.2832	33.6205	34.4291	33.7837	35.0498	32.2035	33.0155	34.7966	36.8396	34.598	33.6534	NAN	33.4269	33.0457	32.7011	32.1597
hsa-miR-185	25.129	25.7976	24.1227	24.1894	26.5238	25.4357	26.3266	25.513	25.1895	25.8527	25.672	26.0305	25.4042	25.5614	25.2002	27.127	26.6295	25.6693	26.0303	24.736
hsa-miR-186	27.5535	28.4006	26.9837	27.1769	29.1121	29.0514	29.0171	28.0698	27.8096	27.9618	27.7309	28.13	28.2788	28.1355	28.1617	30.4768	28.7538	29.2178	28.7919	27.6403
hsa-miR-18a	28.281	29.4117	28.3416	28.4221	31.0084	29.4382	30.3065	28.9607	29.2605	28.9406	29.8178	30.4603	30.7227	29.1301	29.285	31.4458	30.5917	30.3145	30.0057	28.5572
hsa-miR-18a*	32.4842	31.6791	32.9421	31.5384	33.3193	33.8462	32.4363	31.0709	31.0199	32.3513	33.7072	32.7116	35.1487	32.0111	33.2178	34.376	33.8231	NAN	33.7338	32.4455
hsa-miR-18b	28.2993	29.2307	27.798	27.9456	30.2614	29.4752	29.9733	28.8237	29.0819	28.9296	29.0038	30.5532	30.3972	28.142	29.1775	30.9731	30.1015	30.4332	29.3705	28.0508
hsa-miR-191	31.6754	28.3566	27.9933	27.3004	29.6192	28.1517	27.9676	27.7323	27.723	27.8056	28.9477	29.2834	28.9461	27.368	28.577	29.9824	29.0605	30.1551	28.0345	27.2901
hsa-miR-192	28.0506	27.507	28.3271	27.8938	29.9485	29.9391	29.9997	29.2845	29.376	27.8353	28.9161	29.8255	30.6721	29.0141	29.1549	30.6808	28.8793	29.3373	28.6604	28.0536
hsa-miR-193b	31.1615	30.0121	31.6504	32.3538	31.311	32.4112	32.3326	30.7802	32.0013	31.0867	30.5617	33.1466	33.942	30.6616	31.2744	34.6576	31.2872	31.8732	32.1158	31.5392
hsa-miR-194	30.2392	28.8194	29.5783	29.649	30.8483	30.5837	31.4555	30.4846	30.4591	29.0961	30.4939	30.7991	32.0079	30.1281	30.5536	32.3584	30.0994	30.8281	30.8066	29.2163
hsa-miR-195	31.02	30.9694	31.2909	31.6506	33.8084	32.1363	33.7078	31.9575	32.7597	32.5102	32.3939	34.2402	32.5986	30.8924	33.8057	34.4821	32.4294	31.7474	32.1318	30.7522
hsa-miR-197	29.9915	29.2793	28.967	28.9473	29.0584	28.9384	28.7688	28.8113	28.5214	28.1341	28.7951	30.0099	29.153	28.4866	29.7309	31.3535	29.9077	30.8604	29.7114	28.4754
hsa-miR-1974	25.111	24.3537	23.7814	24.219	25.5781	24.2713	23.3498	24.1496	22.9987	24.6672	26.8935	25.3281	25.5003	23.9965	25.7125	26.8335	26.2542	27.4836	26.4985	24.7114
hsa-miR-199a-3p	27.5611	28.5312	28.2173	28.229	28.7209	27.8666	27.4392	27.2998	27.4345	27.5106	29.1685	29.3345	30.3287	27.5208	28.1117	30.3496	29.1057	30.2329	29.7444	26.9989
hsa-miR-199a-5p	27.1556	29.1524	28.699	28.5831	30.1302	28.7807	28.4367	28.0046	28.2855	28.221	29.8041	30.0502	30.9658	27.5913	29.4479	32.1688	29.6918	32.1612	29.4203	27.6781
hsa-miR-19a	27.0988	27.9601	26.6454	26.7201	29.7434	28.4925	29.5967	28.3121	27.7837	28.0197	28.002	28.6985	28.9016	27.2294	28.1824	30.7055	28.8299	29.273	28.3587	27.6398
hsa-miR-19b	23.0182	23.6252	22.2896	22.0431	25.1395	24.2726	24.9297	23.506	23.3622	23.5656	22.8512	23.956	17.1836	23.1871	23.4662	25.527	24.2711	24.3036	23.8169	22.9832
hsa-miR-200c	33.0587	33.9919	33.1722	31.9943	34.4857	32.9028	33.9778	33.4273	32.4153	33.1294	34.4273	32.532	33.1675	31.6532	33.9537	35.7756	33.6587	33.3857	33.6805	32.0013
hsa-miR-205	31.4328	31.241	32.3389	35.4249	33.2862	31.9442	34.9959	31.9713	32.82	31.7284	31.4093	34.1025	33.6272	31.5104	33.4855	35.4693	30.5793	32.6934	31.4477	31.6916
hsa-miR-20a	24.5263	25.5286	24.3056	24.635	25.7217	24.4682	25.0343	23.7741	23.8802	23.8463	25.8839	27.247	27.6779	24.6406	25.0991	27.0176	25.6322	25.7418	25.842	24.1675
hsa-miR-20a*	31.0463	33.6701	32.9664	34.2167	NAN	34.9351	33.7758	32.2973	33.4089	32.3717	NAN	NAN	34.9323	33.5955	35.5942	34.8312	32.3972	34.7956	34.7867	32.7816
hsa-miR-20b	31.1293	32.1379	30.6461	30.3882	31.4547	30.6349	31.238	30.6886	31.2356	29.8218	32.1876	32.6935	33.2597	31.1491	31.9984	34.8678	32.335	33.1014	32.8208	31.7809
hsa-miR-21	25.1495	23.6146	23.455	23.2513	26.3123	25.2874	25.6664	24.707	24.7998	24.9274	23.9705	24.6688	23.9773	23.4711	23.8601	25.3427	24.333	25.013	24.1127	23.3198
hsa-miR-210	28.7584	28.2994	27.782	28.0564	31.2325	30.2504	30.9346	29.8603	29.6944	29.2218	29.0817	29.5577	28.9553	28.4159	30.0702	30.8094	30.6319	30.5533	30.2599	29.4345
hsa-miR-2110	31.3234	30.0127	29.8947	29.6025	30.8565	28.3133	31.0577	31.3149	30.8686	31.0996	29.8692	30.6034	30.8499	30.0671	30.7562	32.2397	32.5246	32.7994	32.8756	29.7531
hsa-miR-215	29.1024	28.3458	29.5178	29.3016	31.4659	30.5984	30.9227	29.7386	29.9835	28.8626	29.3904	30.5481	31.3607	30.1976	29.8794	31.9057	29.8551	30.8046	30.0824	28.6064
hsa-miR-22	25.9412	26.2561	25.3672	25.4544	27.8756	26.7638	26.9999	26.4574	25.689	26.4061	26.268	26.6521	26.4508	26.1835	26.1168	27.9249	26.7062	27.4555	26.8454	25.5616
hsa-miR-22*	29.1136	29.9112	29.324	28.8822	29.9582	28.9263	29.7749	28.92	28.7046	28.552	29.8629	31.0267	30.5917	29.1691	29.9838	31.4515	30.325	30.3357	29.3784	28.669
hsa-miR-221	26.2822	26.6742	26.6955	26.576	26.767	25.7718	25.8738	25.1445	25.1015	25.759	28.4487	27.7549	28.5838	25.6936	26.2669	29.793	27.6369	30.0157	28.0191	25.8942
hsa-miR-222	28.4096	29.0878	28.7019	28.3141	28.2125	27.8499	27.9997	27.452	27.4055	27.6326	28.3697	29.6799	31.1733	28.129	29.2129	31.1742	29.0704	30.4601	30.0606	29.0074
hsa-miR-223	21.865	21.4466	21.6874	21.6126	22.2812	22.1885	22.3021	21.7488	21.5758	21.147	21.4005	22.1073	21.9844	21.0558	22.012	23.7043	22.4673	23.5823	23.2875	20.7881
hsa-miR-223*	31.4624	31.3654	30.4722	30.9479	31.028	30.5959	30.6244	30.262	30.4539	30.7513	30.4681	31.7382	20.0415	30.4246	32.31	33.0668	31.2568	32.4272	32.0438	30.1071
hsa-miR-23a	24.3319	24.4101	24.6381	24.3062	25.3334	24.587	24.664	24.2873	24.1462	24.217	25.0545	25.1611	24.7947	24.0499	24.8156	26.3496	25.0381	26.5011	25.3109	23.6497
hsa-miR-23b	26.0605	26.3183	26.5419	26.4973	27.8628	26.7636	26.5937	26.4879	26.3884	26.2021	27.2803	27.4407	26.9061	26.5205	26.887	28.3729	27.6021	28.501	27.806	25.7136
hsa-miR-24	24.3781	24.6785	24.7892	24.8862	25.5306	24.7486	24.5001	24.3129	24.3329	24.0118	24.9179	25.4029	25.18	24.3547	25.2	26.3351	25.5612	26.7495	25.4265	23.8526
hsa-miR-25	25.7115	26.5916	24.4157	24.5692	26.6296	25.7541	26.6116	25.4666	25.3016	25.3394	25.5695	26.6493	26.2016	26.2933	25.848	27.6647	27.1432	26.266	26.6549	25.5085
hsa-miR-26a	25.0438	25.743	25.5565	25.8331	27.1225	25.3908	25.6049	25.0955	25.4789	25.3324	26.8004	27.327	27.3405	25.1737	25.4349	27.9259	26.0251	26.9943	26.8908	24.7194
hsa-miR-26b	27.3729	27.3548	27.215	29.4542	28.6604	27.4854	27.5863	27.3324	27.4301	26.9938	28.0889	29.1845	29.4739	27.3712	27.4207	29.7866	27.4946	27.9183	29.3974	25.885
hsa-miR-27a	25.2795	25.5319	25.7285	25.7968	27.2804	26.589	26.6877	25.8292	25.6364	25.9609	26.9557	27.0579	28.4152	25.0249	26.7798	28.1936	26.374	27.9613	27.1417	25.2091
hsa-miR-27b	26.1786	26.2317	27.1688	27.2543	28.4818	27.7602	27.3359	26.7981	26.8836	26.6418	27.6261	28.1475	28.8746	26.0398	27.8265	29.1308	27.4394	28.9684	28.131	26.0758
hsa-miR-28-3p	30.4103	30.0175	30.4201	30.1397	31.7112	30.3179	30.0494	29.88	30.5504	30.2088	30.3673	31.3216	31.1666	30.1483	30.2101	32.8931	30.9619	31.9518	31.4772	29.6994
hsa-miR-28-5p	31.4247	30.2626	30.4818	30.2743	33.0493	30.1714	29.9004	29.9602	30.6725	29.745	30.9354	30.9769	31.2383	30.4563	30.6144	32.5881	31.0269	33.7392	31.7859	29.5895
hsa-miR-297	30.1276	28.6417	29.6767	28.9542	31.6469	32.6556	32.6433	32.0054	30.7756	31.9147	29.1851	29.1123	29.5485	29.1345	31.9381	33.2502	34.3053	34.5527	34.4354	31.1489
hsa-miR-29a	28.0049	27.4627	27.7653	26.9328	28.7886	28.9781	28.9495	27.8524	28.6466	28.0593	26.3304	28.521	28.7607	26.9816	27.8585	29.4372	27.5711	28.7352	27.9281	27.3992
hsa-miR-29a*	31.8789	31.2782	32.4849	31.416	39.0754	34.397	27.9137	33.7043	33.4922	32.806	30.4422	31.7191	31.5708	31.8419	32.4953	34.4822	33.0016	34.0369	31.8743	31.5598
hsa-miR-29b	28.164	28.7489	27.9113	27.9894	31.4571	30.2024	31.039	29.2961	28.5281	29.5015	27.9026	30.009	30.6121	28.3326	29.3378	32.5961	29.2829	30.502	29.5582	28.9616
hsa-miR-29b-2*	33.452	32.6126	31.8107	30.6694	NAN	32.6643	NAN	31.7964	33.7281	32.0541	33.4473	33.4551	33.5518	NAN	33.2155	NAN	34.5362	33.9492	33.7434	31.8207
hsa-miR-29c	26.3267	26.477	25.8375	25.5427	28.1783	27.6934	26.0122	26.8221	26.823	26.8902	25.4291	27.0657	27.7165	26.0282	26.9096	28.715	26.8207	27.6701	27.2721	26.0871
hsa-miR-301a	31.1911	31.9676	31.1358	31.2171	31.0819	30.296	30.6063	30.6562	30.2288	30.6474	31.5364	32.9273	34.2746	29.973	31.9808	36.6494	33.1877	32.9051	32.1282	30.3436
hsa-miR-30a	31.8664	31.3603	31.6425	31.7494	32.5159	33.6116	32.4275	32.3166	32.122	31.9166	32.7433	32.9498	33.6812	31.2474	32.3448	35.0055	31.5899	32.7265	32.7927	31.8687
hsa-miR-30b	27.5612	28.6459	28.5781	28.8141	29.634	28.2829	28.5419	27.8509	28.0869	27.7482	29.9551	30.9412	32.3104	27.7631	29.5628	31.9426	29.5299	30.9044	29.8575	28.7114
hsa-miR-30c	27.2281	28.0892	27.8496	28.1253	29.4654	27.5355	27.6369	27.3722	27.1409	27.2979	28.779	29.9288	30.667	27.4327	28.45	30.5945	28.992	30.0639	29.862	27.453
hsa-miR-30d	28.3355	28.7547	28.6707	28.4291	29.9023	28.3344	28.441	27.9272	27.4312	27.9441	29.5328	30.5137	30.3822	28.5533	28.6031	30.7874	29.1197	30.3534	29.6324	28.3405
hsa-miR-30e	30.0448	30.2181	29.6223	29.1943	30.0002	29.5075	30.368	29.344	28.8765	28.7947	30.2174	31.1703	31.8945	29.5626	31.0874	32.3403	30.884	31.2354	30.8856	29.5199
hsa-miR-30e*	30.9664	30.9711	30.6623	30.2493	30.35	29.6408	29.9252	29.8822	29.5682	29.8814	31.0912	31.7322	32.0418	29.8445	30.2495	31.7718	30.0656	31.4561	32.9522	29.6341
hsa-miR-32	29.7812	30.6876	28.3706	29.5622	30.6272	29.9313	30.424	29.109	29.4039	28.9923	30.6052	31.495	32.5035	29.0346	30.4711	32.571	31.4935	30.5987	31.4286	30.3842
hsa-miR-320a	24.8907	25.4553	24.3679	24.5169	26.2043	25.1442	25.4836	24.8648	24.5777	24.7783	25.3075	25.6023	25.5037	25.479	25.0861	25.8589	25.9464	26.0594	26.0398	24.6315
hsa-miR-320b	25.1185	25.4127	24.4883	25.3036	26.304	25.2359	25.5434	24.9253	24.7389	25.064	25.3264	25.4888	25.4729	25.478	25.2831	25.8001	26.2437	25.8941	26.5468	25.0022
hsa-miR-324-3p	28.7153	29.2953	27.6388	28.317	31.1405	29.4811	29.9178	29.2531	29.3818	28.9743	28.5673	29.5214	29.2083	28.934	29.3242	30.6332	30.3223	29.5668	30.1491	28.1435
hsa-miR-324-5p	29.148	29.8974	29.2813	29.041	31.9131	30.2257	30.7399	29.7394	29.7627	29.9725	30.1653	30.7616	30.8045	29.5475	29.6825	31.8109	31.4274	31.3925	30.5613	28.7518
hsa-miR-326	28.2749	28.7756	29.2817	29.0525	31.1325	31.9027	29.8687	29.7341	29.0958	29.6534	29.7687	29.7112	30.2828	28.2985	30.2828	31.9665	30.5121	32.7335	32.0091	29.2206
hsa-miR-328	29.0593	29.509	29.5534	29.1865	31.5164	29.6036	29.6435	28.882	29.0039	28.9434	29.9767	29.6378	30.0039	29.4927	30.2068	33.0911	30.8891	32.9217	31.6529	29.5955
hsa-miR-331-3p	30.0713	30.9645	30.4861	31.0442	31.5697	30.1468	30.3855	29.5041	30.4392	29.5628	31.4796	31.0558	32.2766	30.187	30.7825	32.8839	31.6465	32.421	31.6701	30.4446
hsa-miR-335	29.0284	29.5966	29.8432	29.7739	31.7489	30.5984	31.0359	29.9679	29.8394	30.3981	30.5631	30.9326	32.1044	29.3401	29.7813	31.6047	30.5492	32.5611	30.415	28.8537
hsa-miR-338-3p	28.5121	27.9689	27.3464	27.6111	29.8063	29.651	29.6229	28.9923	28.6747	28.0912	27.3168	27.1308	27.6936	27.4399	28.9146	30.5508	29.0426	30.0724	28.7459	26.9269
hsa-miR-339-3p	30.9166	32.3323	31.4886	30.5629	33.6112	33.1544	32.8164	32.0853	31.5415	31.6277	33.3559	33.0118	32.6973	31.2546	32.0996	33.8371	33.1589	33.801	31.7015	31.1175
hsa-miR-339-5p	31.9242	32.1167	31.9038	31.0939	35.5305	32.6911	31.9261	31.5395	31.1578	31.7223	31.7027	32.9111	32.8832	31.061	32.0327	34.6503	33.2901	34.5577	32.4377	31.108
hsa-miR-33a	27.7003	28.9185	29.1182	29.5746	32.5596	31.2297	30.7411	30.2201	30.7068	29.7055	29.9575	29.8614	31.6569	28.3723	30.539	33.947	30.8507	33.4077	31.037	29.4385
hsa-miR-342-3p	29.1421	28.7075	29.6337	28.3345	28.7596	28.597	28.9375	27.8664	28.8043	28.4734	27.2142	30.5504	30.5536	29.5929	27.9464	30.4183	28.5368	29.393	29.5018	28.3367
hsa-miR-346	32.2458	31.4688	31.7328	31.3769	31.6299	32.2523	32.1427	32.9315	32.8733	32.085	31.2745	31.1022	31.7689	31.9959	32.1495	32.5784	32.48	32.721	33.4445	32.0903
hsa-miR-34a	31.817	31.263	33.1656	31.8014	32.1781	32.5169	32.0306	30.8142	31.752	29.9794	32.4437	33.3273	33.2199	31.3898	33.7642	35.6298	34.862	34.6969	33.6404	32.041
hsa-miR-361-3p	31.2884	31.6863	30.7183	31.1517	32.1075	31.1324	32.3807	31.4592	30.9697	30.986	30.2801	31.61	31.738	31.5967	32.143	32.7626	31.6205	34.9527	31.9968	31.179
hsa-miR-363	28.7957	28.7152	27.1607	27.7917	27.5829	28.1998	28.7275	27.7961	27.6346	27.8779	28.7446	29.7356	29.3997	27.8596	27.8116	29.8595	28.2821	28.7162	30.1284	28.1858
hsa-miR-365	31.8396	30.75	31.406	31.1873	30.8431	30.9434	30.4719	30.0753	30.3288	29.4443	33.0215	32.3542	33.4879	30.7562	32.1436	34.7733	31.5381	32.3695	31.4639	29.6328
hsa-miR-374a	30.0786	30.7687	29.8881	29.8156	32.7322	31.182	31.1554	30.3742	31.0038	30.8427	31.2868	32.0358	33.016	29.5878	30.3256	32.2563	30.052	30.5498	31.6719	29.0887
hsa-miR-374b	28.7671	29.1889	28.996	29.3833	31.5444	29.4786	29.8151	29.2748	29.9881	29.4208	30.2213	31.1157	30.0083	29.1467	28.6287	30.7817	28.9525	29.9333	29.0808	27.4274
hsa-miR-375	33.1131	31.3142	32.3591	32.0549	34.8235	34.2987	33.0859	32.7959	32.5922	33.1698	31.2636	33.0957	35.5193	31.5503	33.3301	33.8674	30.6995	31.309	31.3099	32.2206
hsa-miR-376a	28.902	31.7177	31.5011	30.4143	32.9855	30.6917	32.4942	29.7741	NAN	30.7214	31.8531	32.7104	36.7529	30.8103	30.6347	33.6559	18.9663	33.0806	32.5995	29.6587
hsa-miR-378	28.3665	27.4945	27.7779	27.3907	29.9405	29.8787	30.1374	29.2528	28.8008	28.1993	27.9096	28.4889	28.434	28.2592	29.0858	29.924	29.8217	29.483	29.9852	28.7629
hsa-miR-382	29.816	32.2016	30.8393	30.7798	32.9302	31.8018	32.0192	30.9977	30.1515	36.1029	32.7184	31.7494	32.343	31.4528	30.8341	33.7948	31.8056	33.8864	31.9918	30.2067
hsa-miR-409-3p	29.0969	33.3299	30.3231	30.2166	33.5651	30.456	31.6397	29.4514	30.3037	30.0469	30.9376	31.2856	33.8234	31.1991	29.5954	33.1545	30.9871	33.2481	32.0729	29.1069
hsa-miR-421	31.15	31.3257	31.2641	31.0895	32.2996	31.9299	32.036	31.8905	31.6241	31.6001	31.3587	34.1228	32.8683	32.8499	31.824	33.9326	32.5233	33.551	33.0588	31.4972
hsa-miR-423-3p	27.513	28.2429	27.773	27.66	28.8225	27.7651	27.3994	27.3094	27.0407	27.341	28.3663	28.6458	28.6192	27.5757	28.17	30.4626	29.3072	30.126	28.7296	27.0924
hsa-miR-423-5p	28.7985	28.6265	27.5305	26.6475	28.8933	27.7718	27.861	27.2932	27.1986	27.3564	28.0873	28.3672	28.0499	27.7649	28.1051	29.1186	28.8736	29.3325	28.5776	27.3445
hsa-miR-424	26.3174	26.1681	26.1298	26.0291	27.785	27.8004	28.4487	27.506	26.6453	26.6086	26.3635	26.987	27.1789	25.9133	27.1909	28.5469	27.0506	27.4222	28.0149	25.8139
hsa-miR-425	27.457	27.6317	26.2182	26.2044	28.2645	26.9574	27.774	26.7592	26.6394	26.7061	26.911	27.5559	27.4012	26.6332	27.0296	28.9538	28.4322	27.8794	27.7021	26.2344
hsa-miR-425*	29.5286	29.9908	30.0342	29.5094	30.5849	30.1356	30.0374	29.5258	29.5823	29.5238	30.2054	30.3473	30.8748	29.3905	30.8682	32.3184	30.9349	33.8239	30.6622	30.1312
hsa-miR-451	18.6275	19.4165	17.4064	17.7855	20.3215	19.2432	20.4034	18.3155	18.2848	18.2045	18.6662	20.504	20.4628	19.1436	19.434	21.4699	19.764	19.2207	19.9059	18.5745
hsa-miR-484	27.3267	28.1399	26.4866	26.9474	28.034	27.242	27.674	26.8422	26.7069	26.9621	28.0771	28.5353	28.8606	27.541	27.659	29.8271	28.3212	28.4902	28.5065	26.9658
hsa-miR-485-3p	25.3159	25.7729	25.8739	25.4458	20.8482	21.1312	21.2903	21.0974	20.5961	21.3326	25.8047	26.2933	26.9404	24.9568	22.5227	23.5282	21.2844	21.8107	29.0135	21.8092
hsa-miR-486-5p	24.2769	25.3887	22.9001	23.3933	24.7238	23.7067	24.7834	23.5499	23.5425	23.5787	24.8625	26.1697	25.2117	25.5897	24.3735	25.7027	25.6945	24.3519	25.2828	24.353
hsa-miR-495	29.749	33.0136	30.8934	30.6851	32.2185	30.2172	31.5464	29.615	29.508	29.8555	31.8801	31.8813	34.7816	30.9819	30.789	34.9257	32.0396	31.9049	33.5068	29.3485
hsa-miR-497	30.3961	30.6007	30.2704	30.5674	33.6127	31.7056	33.1033	30.5551	31.6873	31.3642	30.1776	31.2472	32.1507	30.019	33.907	33.2751	32.0235	32.877	31.0372	31.7416
hsa-miR-500a	32.2841	32.933	30.4907	NAN	32.9937	32.7182	34.6843	33.1184	34.8232	32.7412	32.3533	33.5844	34.3065	32.3314	34.5097	35.4818	32.6279	33.3767	33.3363	32.6122
hsa-miR-501-3p	32.9047	32.7607	32.3848	32.314	32.8697	31.9923	33.531	32.5596	32.0367	33.1504	32.1927	33.6789	35.0209	32.819	33.159	36.1614	33.2383	33.6209	35.2965	32.5677
hsa-miR-502-3p	30.7548	31.2449	30.7649	30.9198	32.0751	31.7758	32.3785	31.4528	30.6341	32.0656	31.3043	31.5286	31.5899	30.493	31.6174	35.9576	31.9995	32.3648	32.8925	30.9649
hsa-miR-505	30.1937	30.1002	30.8088	30.1985	31.3193	31.1795	30.287	30.8959	30.8261	29.9311	30.381	30.5416	32.2382	30.3958	31.1259	32.7846	31.4915	31.6056	31.0266	30.364
hsa-miR-532-3p	30.9832	30.4819	30.6304	30.1295	31.9886	32.1165	32.0791	30.6222	30.9011	30.753	30.51	31.1491	33.8123	30.8405	31.6985	35.7773	32.1153	30.8679	33.1304	30.4922
hsa-miR-532-5p	30.4927	31.4654	29.6487	30.1069	31.1024	30.2659	31.6072	30.3393	29.9043	30.3633	30.7818	32.26	32.3968	31.4741	31.0918	32.7456	31.5852	31.5319	31.9841	30.8917
hsa-miR-543	30.0813	32.1984	31.8002	30.7013	32.1742	31.5284	33.0509	29.9734	30.8986	30.9448	31.8477	33.0263	32.0019	30.9278	30.623	34.6919	34.1177	32.515	32.1329	30.4958
hsa-miR-551b	31.9288	32.7007	33.4466	34.9857	34.2278	31.6284	32.3408	31.7085	32.4753	32.0712	33.011	31.9417	35.4464	31.1602	34.8979	34.7593	34.6055	NAN	35.2393	31.5154
hsa-miR-574-3p	30.3414	30.3492	30.7344	30.2916	30.8834	30.7389	30.767	29.7749	29.9968	30.0732	30.9685	30.6718	31.867	30.839	30.2438	31.7798	31.3247	31.6461	31.6079	29.8347
hsa-miR-584	31.4198	31.5822	30.907	30.9584	33.5082	31.792	30.5348	31.7477	31.1604	32.0549	32.4393	31.6344	31.4874	30.823	31.497	32.4704	33.0011	33.379	32.0165	30.7281
hsa-miR-590-5p	28.8774	29.176	28.6486	28.9945	31.7497	30.885	31.0781	30.7843	30.0627	31.0885	30.1983	30.7467	31.1534	28.8691	30.4622	32.2627	30.5879	31.2803	29.8048	28.5807
hsa-miR-605	26.7834	26.8819	27.0305	26.8358	22.2967	22.189	22.7681	22.2698	21.9909	22.1791	27.2791	27.9415	27.8146	26.0572	23.5681	24.9518	22.6258	23.0994	28.9278	23.0153
hsa-miR-629	32.9245	32.2486	30.2731	30.8401	32.1303	31.0028	31.5508	31.0599	31.4004	30.8729	31.7143	31.0654	31.2951	30.9424	31.9516	33.5401	32.4644	31.3683	32.6743	31.1276
hsa-miR-652	27.5011	28.4957	27.6179	27.8457	28.6292	27.1647	27.7133	27.1265	26.9971	27.1427	28.4597	29.2822	29.4278	27.9832	28.3362	30.7157	28.8235	29.01	29.0694	27.1776
hsa-miR-660	30.7699	30.2321	29.5146	29.4872	31.2959	31.128	31.5208	30.6763	30.3583	30.6437	30.4495	31.6073	31.7716	30.3577	30.499	32.6259	31.013	31.1469	31.1304	29.9596
hsa-miR-720	22.6704	23.0736	22.7683	24.2155	20.3566	20.4413	20.8481	20.3876	20.0899	20.0134	NAN	23.6038	23.9297	22.7679	21.1737	22.1943	20.4632	20.6538	24.8751	20.4119
hsa-miR-766	29.9911	30.5377	30.3701	30.537	31.6995	30.6634	30.5276	30.1214	30.6231	30.7006	31.6902	32.0556	32.8535	30.0585	31.6626	33.781	31.7702	34.086	33.9088	30.2269
hsa-miR-885-5p	33.4545	31.0285	34.7592	32.9254	34.1626	34.6553	32.8488	32.732	33.6838	30.7959	33.7448	34.3879	33.772	32.3563	35.0061	34.9474	35.1774	34.8569	33.7847	33.8432
hsa-miR-92a	23.2927	24.2479	22.8494	23.0261	24.2223	23.47	24.0179	22.8091	22.8209	23.0985	24.1962	25.3974	24.8271	24.1124	23.7236	25.633	24.8721	24.5122	24.5918	23.5177
hsa-miR-92b	33.3922	32.5066	32.7746	31.8301	35.4057	32.7568	32.9522	32.7814	31.4705	32.3966	33.2815	33.4653	34.3555	32.5276	32.7456	NAN	33.9674	34.031	33.4912	32.6091
hsa-miR-93	25.7737	25.5034	23.9017	24.4105	25.6638	24.5939	25.4747	24.4549	24.394	24.1379	25.1486	26.1989	26.4659	25.066	25.8187	27.4222	26.311	25.9823	26.0521	24.662
hsa-miR-93*	30.918	30.7217	30.7897	30.0431	32.8643	30.9467	33.0501	30.7402	31.0233	31.027	30.8137	31.3128	30.8059	30.4919	30.9433	33.7438	32.1167	31.82	31.8241	30.6291
hsa-miR-95	32.8865	33.6644	34.617	36.3457	NAN	34.4441	33.6666	37.3019	33.682	34.4052	34.1036	33.6133	NAN	34.2395	35.0687	NAN	34.6015	36.42	36.0483	NAN
hsa-miR-99a	29.5292	28.6394	30.1091	30.1043	30.8394	31.1127	31.4048	29.8096	30.6211	29.1934	29.946	30.5432	32.1072	30.0464	31.154	31.7374	30.6802	32.3288	30.5552	30.3762
hsa-miR-99b	29.1404	29.8959	30.0978	30.945	31.1195	29.7284	30.3762	30.0063	30.8493	30.5255	30.936	31.0821	32.2312	29.9792	30.275	31.1353	30.8814	33.9945	31.2648	29.9756
